# Supplementary material for: Enhanced thermal conductivity over percolation threshold in polyimide blend films containing ZnO nano-pyramidal particles: advantage of vertical double percolation structure
Source: Royal Society of Chemistry journal article supplement (doi:10.1039/c0jm04243a), 2011-01-01
Supplement: c0jm04243a.pdf [file c0jm04243a.pdf]

## Electronic Supporting Information

for

### Enhanced thermal conductivity over percolation threshold in polyimide blend films containing ZnO nano-pyramidal particles: advantage of vertical double percolation structure

Daisuke Yorifuji and Shinji Ando\*

Department of Chemistry and Materials Science, Tokyo Institute of Technology, Ookayama 2-12-1-E4-5,  
Meguro-ku, Tokyo 152-8552, Japan. Fax: 03 5734 2137; Tel: 03 5734 2889;  
E-mail: sando@polymer.titech.ac.jp

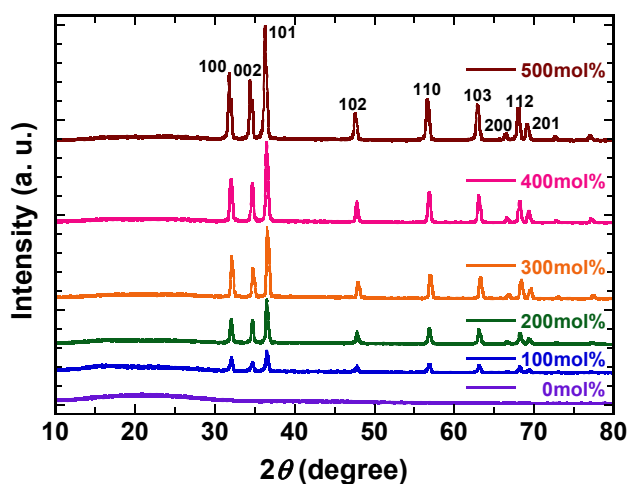

**Fig. S1** XRD patterns of ZnO-NP/PI blend hybrid films: *Blend-0 – 500*.
